# Supplementary material
Source: Copernicus journal article supplement (doi:10.5194/essd-2026-40)
Supplement: Supplementary file 1 [file essd-2026-40-supplement.pdf]

1  
2  
3  
4  
5  
6  
7  
8  
9  
10  
11  
12  
13  
14  
15  
16  
17  
18  
19  
20  
21  
22  
23  
24  
25  
26

## Supporting Information for

# EGO: a global 0.05° hourly GPP dataset for monitoring diurnal photosynthesis dynamics

Xi Liu<sup>1</sup>, Xing Li<sup>1,\*</sup>, Dalei Hao<sup>2</sup>, Jingfeng Xiao<sup>3</sup>, Yanan Zhou<sup>1</sup>, Cenliang Zhao<sup>1</sup>, Zikang Diao<sup>1</sup>, Fuqiang Qu<sup>1</sup>, Shangrong Lin<sup>1</sup>, Xiangzhuo Liu<sup>4</sup>, Zhaoying Zhang<sup>5</sup>, Xinjie Liu<sup>6</sup>, Helin Zhang<sup>7</sup>

1 School of Geography and Planning, Sun Yat-sen University, Guangzhou 510006, China

2 Atmospheric, Climate, & Earth Sciences Division, Pacific Northwest National Laboratory, 902 Battelle Blvd, Richland, WA 99354, USA

3 Earth Systems Research Center, Institute for the Study of Earth, Oceans, and Space, University of New Hampshire, Durham, NH 03824, USA

4 INRAE, Bordeaux Sciences Agro, UMR 1391 ISPA, Villenave-d'Ornon, France

5 International Institute for Earth System Sciences, Jiangsu Center for Collaborative Innovation in Geographical Information Resource Development and Application, Nanjing University, Nanjing, Jiangsu 210023, China

6 Key Laboratory of Digital Earth Science, Aerospace Information Research Institute, Chinese Academy of Sciences, 100094 Beijing, China

7 Research Institute of Agriculture and Life Sciences, Seoul National University, Seoul 08826, Republic of Korea

\* Correspondence: Xing Li ([lixing58@mail.sysu.edu.cn](mailto:lixing58@mail.sysu.edu.cn));

## Contents of this file

Text S1 to S6

Figures S1 to S20

Tables S1 to S3

## 27 **Text S1. Conversion of timestamps to local solar time**

28 To analyze diurnal photosynthetic dynamics with physical consistency across  
29 global sites, it is essential to align observations to the sun's position rather than local  
30 time. We converted all original timestamps to Local Solar Time (LST) (Zerubavel et  
31 al.,1982). In LST, 12:00 (solar noon) corresponds to the time when the sun reaches its  
32 highest point in the sky at the specific location. This conversion removes phase shifts  
33 caused by the site's longitude relative to its time zone central meridian. The calculation  
34 of LST involves two main corrections: the Equation of Time (EoT) and the Longitude  
35 Correction (LC). The general formula is expressed as:

$$36 \quad LST = t_{local} + \frac{LC+EoT}{60} \quad (\text{Eq.S1})$$

37 where  $t_{local}$  is the local time. The EoT accounts for the irregularity of the sun's  
38 apparent motion due to the earth's elliptical orbit and axial tilt. It is calculated as:

$$39 \quad EOT = 9.87 * \sin(2\Phi) - 7.53 * \cos(\Phi) - 1.5 * \sin(\Phi) \quad (\text{Eq.S2})$$

$$40 \quad \Phi = 2\pi * (DoY - 81)/365 \quad (\text{Eq.S3})$$

41 where DoY is the day of the year (1–365 or 366), and  $\Phi$  is the day angle in radians.

42  $\lambda_{site}$  is the longitude. For datasets provided in UTC (e.g., ERA-5 Land), the reference  
43 meridian  $\lambda_{site}$  is 0. The conversion simplifies to:

$$44 \quad LST = t_{UTC} + \frac{4 \times \lambda_{site} + EoT}{60} \quad (\text{Eq.S4})$$

45 For datasets provided in local time (e.g., FLUXNET2015 and AmeriFlux), we first  
46 identified the time zone offset ( $TZ_{offset}$ ) based on the site's metadata. The reference  
47 meridian for the local time zone is determined as  $\lambda_{ref} = 15^\circ * TZ_{offset}$ .

$$48 \quad LST = t_{local} + \frac{4 \times (\lambda_{site} - 15 \times TZ_{offset}) + EoT}{60} \quad (\text{Eq.S5})$$

49 Alternatively,  $t_{local}$  can first be converted to UTC ( $t_{local} = t_{local} - TZ_{offset}$ ), and then  
50 the formula Eq.S4 is applied. By applying these corrections, all diurnal cycles were  
51 centered around solar noon, enabling a rigorous cross-site comparison of diurnal  
52 metrics (e.g., peak time and centroid).

53

54 **Text S2. Calculation of VPD**

55 To compute vapor pressure deficit (VPD) from ERA5-Land hourly air temperature  
56 ( $T_a$ ) and dew point temperature ( $T_d$ ), we first ensure both variables share the same units.  
57 ERA5-Land typically provides temperature in kelvin. We converted K to °C by  $T_C = T_K$   
58  $- 273.15$ . Compute saturation vapor pressure  $e_s$  at the air temperature using the Magnus–  
59 Tetens approximation (Yuan et al., 2019):

60 
$$e_{s(T)} = 0.6108 \times \exp\left(\frac{17.27 \times T}{T + 237.3}\right) \quad (\text{Eq.S6})$$

61 and compute actual vapor pressure  $e_a$  from the dew point temperature:

62 
$$e_{a(T_d)} = 0.6108 \times \exp\left(\frac{17.27 \times T_d}{T_d + 237.3}\right) \quad (\text{Eq.S7})$$

63 Both  $e_{s(T)}$  and  $e_{a(T_d)}$  are in kilopascals (kPa). The VPD is the difference:

64 
$$VPD = e_{s(T)} - e_{a(T_d)} \quad (\text{Eq.S8})$$

65 Apply the calculations for every hourly time step and grid cell.

66

67

68 **Text S3. Calculation of EVI and LSWI**

69 Use the BRDF-corrected surface reflectance from MODIS MCD43C4 to compute  
70 the two vegetation indices as follows.

71 First, convert the stored reflectance values using the product's scale factor. Use the  
72 bands corresponding to red (R), near-infrared (NIR), blue (B) and a shortwave-infrared  
73 (SWIR) band. Then compute Enhanced Vegetation Index (EVI) (Zeng et al., 2022):

74 
$$EVI = 2.5 \frac{\rho_{NIR} - \rho_R}{\rho_{NIR} + 6\rho_R - 7.5\rho_B + 1} \quad (\text{Eq.S9})$$

75 EVI reduces soil and atmospheric influences and is less prone to saturation in  
76 dense canopies than NDVI (Huete et al., 2002); it therefore better captured canopy  
77 greenness and photosynthetic capacity at high biomass.

78 Land Surface Water Index (LSWI):

79 
$$LSWI = \frac{\rho_{NIR} - \rho_{SWIR}}{\rho_{NIR} + \rho_{SWIR}} \quad (\text{Eq.S10})$$

80 LSWI is sensitive to leaf and surface water content (canopy liquid water and soil  
81 moisture influence), making it useful for detecting moisture stress and short-term  
82 changes in plant water status (Zhang et al., 2025).

83

84 **Text S4. Interpretation of sub-grid strategy**

85 As seen from FigS1., scenario (a) serves as the baseline, with a composition of F:  
86 60%, G: 10%, and C: 30%. Scenarios (b) and (c) represent two distinct land-use change  
87 trajectories originating from (a): in (b), cropland expands significantly (F: 50%, G: 5%,  
88 C: 45%), while in (c), grassland replaces substantial portions of other types (F: 50%, G:  
89 45%, C: 5%). Despite these drastic sub-grid variations, the dominant vegetation type in  
90 both (b) and (c) remains "Forest" (50%). Consequently, a traditional upscaling approach  
91 relying solely on the dominant class would fail to detect any land-use change between  
92 (a), (b), and (c), erroneously treating them as stable forest ecosystems. A "land-use  
93 change" is only triggered in the dominant-class scheme in scenario (d) (F: 40%, G: 15%,  
94 C: 45%), where the forest fraction further declines and cropland finally exceeds forest  
95 to become the dominant type. In contrast, our fractional coverage method explicitly  
96 captures the quantitative shifts in vegetation composition across all scenarios. By  
97 resolving these sub-grid dynamics—even when the dominant class remains  
98 unchanged—our approach enables the model to incorporate finer-scale land surface  
99 information and more accurately reflect the impact of land-use changes.

## 101 **Text S5. Calculation of R<sup>2</sup>, RMSE and Bias**

102 To evaluate model performance, three statistical metrics were employed: the  
103 coefficient of determination (R<sup>2</sup>), the root mean square error (RMSE), and the mean  
104 bias error (Bias).

105 The coefficient of determination (R<sup>2</sup>) quantifies how well the predicted values  
106 capture the variability of observed data (Li and Xiao, 2019) and is calculated as:

$$107 \quad R^2 = 1 - \frac{\sum_{i=1}^n (y_i - \hat{y}_i)^2}{\sum_{i=1}^n (y_i - \bar{y})^2} \quad (\text{Eq.S11})$$

108 Where  $y_i$  and  $\hat{y}_i$  denote the observed and predicted values, respectively, and  
109  $\bar{y}$  is the mean of observed values. Higher R<sup>2</sup> values (closer to 1) indicate a stronger  
110 correspondence between model outputs and observations, reflecting good predictive  
111 capability.

112 The root mean square error (RMSE) measures the overall magnitude of prediction  
113 errors (Li et al., 2025) and is defined as:

$$114 \quad RMSE = \sqrt{\frac{1}{n} \sum_{i=1}^n (y_i - \hat{y}_i)^2} \quad (\text{Eq.S12})$$

115 It provides an estimate of the average deviation between predictions and  
116 observations. A lower RMSE indicates higher model accuracy and consistency.

117 The mean bias error (Bias) evaluates the systematic offset between predictions and  
118 observations (Li et al., 2025) and is computed as:

$$119 \quad Bias = \frac{1}{n} \sum_{i=1}^n (y_i - \hat{y}_i) \quad (\text{Eq.S13})$$

120 A positive Bias suggests model overestimation, whereas a negative Bias indicates  
121 underestimation.

122 Together, these three metrics provide a comprehensive evaluation framework: R<sup>2</sup>  
123 reflects the model's explanatory power, RMSE quantifies overall error magnitude, and  
124 Bias reveals systematic tendencies. This combination ensures a balanced assessment of  
125 both accuracy and reliability in model performance.

126

127 **Text S6. Evaluation of the sufficiency of diurnal metrics**

128 To evaluate whether the proposed three metrics are sufficient to characterize  
129 diurnal GPP curves, we design four comparative experiments (Case 1–4). For each  
130 experiment, we generated several diurnal GPP curves using a Gaussian-based function  
131 with random perturbations and retained the 100 curves whose computed diurnal metrics  
132 matched those of the reference curve. The mean aggregated curve from each case was  
133 then analyzed to assess whether the corresponding metric combination could  
134 reconstruct the reference diurnal GPP curve. The experimental settings were designed  
135 as follows: controlling only mean GPP (Case 1), controlling both mean GPP and  $\Delta$ GPP  
136 (Case 2), controlling both  $\Delta$ GPP and MDI (Case 3), and controlling mean GPP,  $\Delta$ GPP,  
137 and MDI simultaneously (Case 4). Comparisons of the reconstructed curves with the  
138 reference curve reveals the specific contribution of each metric.  
139

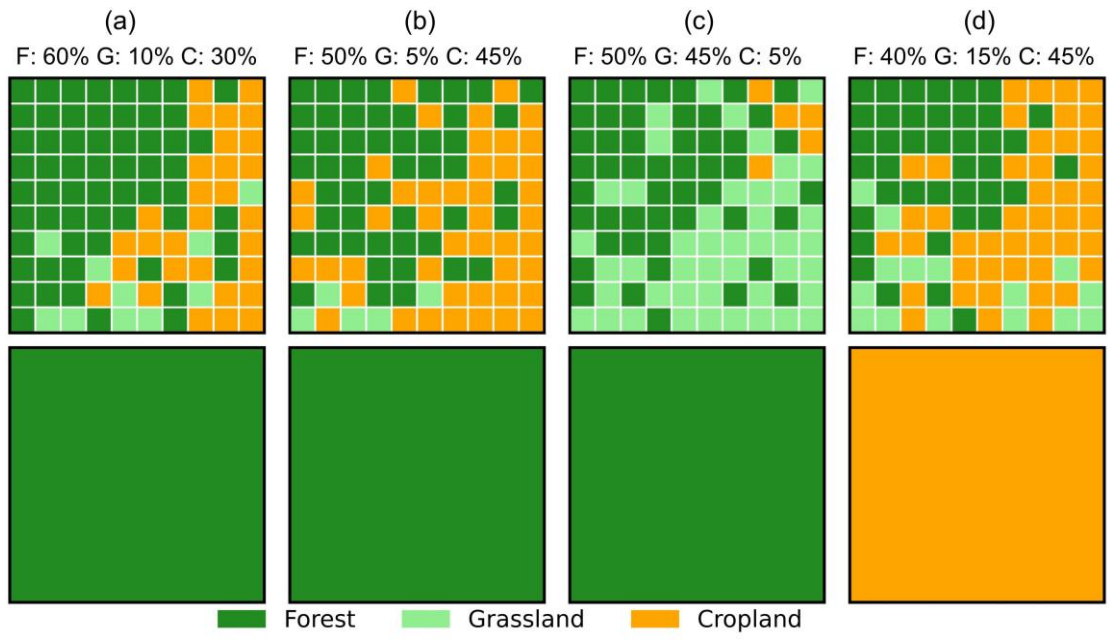

140

141 **Figure S1.** Four hypothetical scenarios (a)–(d) of vegetation composition within a single 0.05° grid  
 142 cell, comprising varying fractions of 500 m pixels classified as Forest (F), Grassland (G), and  
 143 Cropland (C).

144

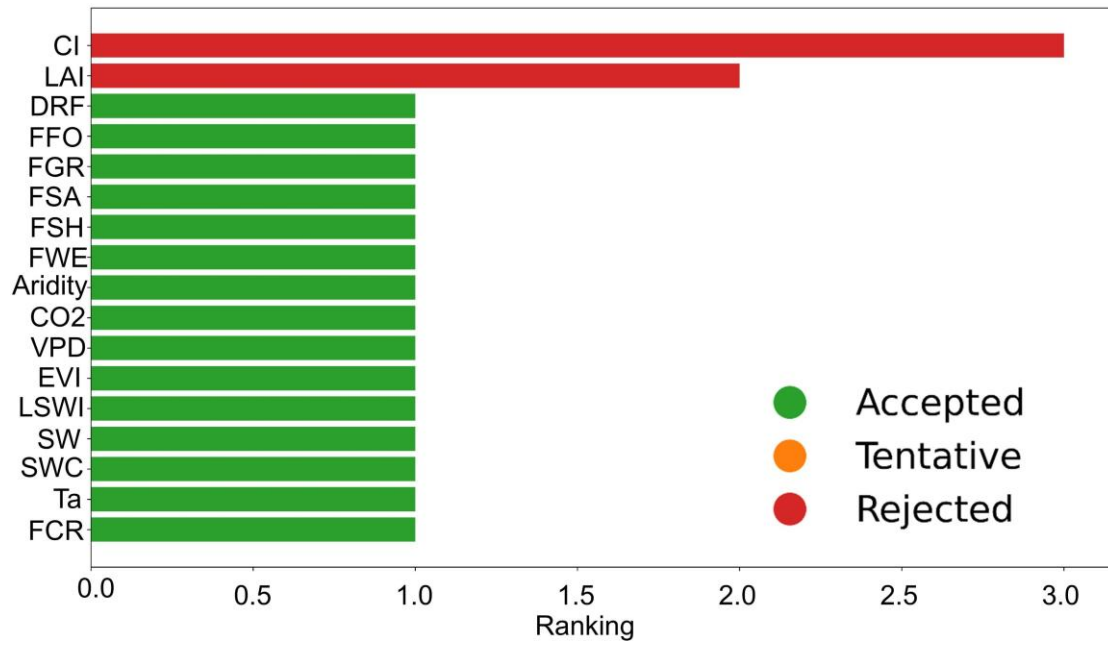

145

146 **Figure S2.** Boruta feature selection. The CI (clumping index) and LAI (leaf area index) were  
 147 discarded due to their lower importance than shadow feature (Red legend).

148

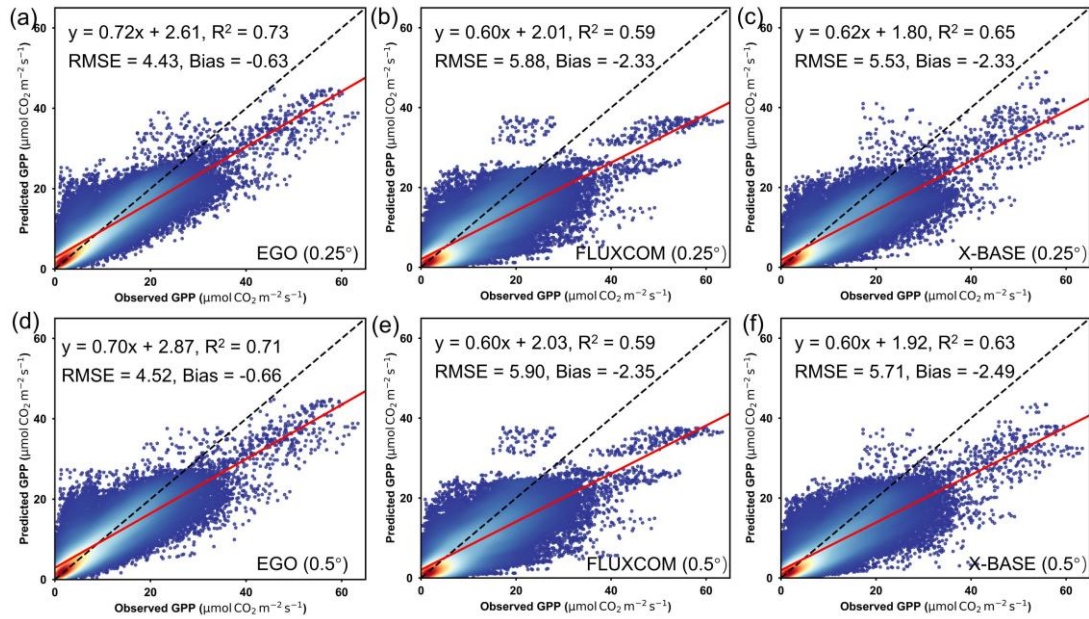

149

150 **Figure S3.** Performance comparison of EGO, FLUXCOM, and X-BASE GPP products against site  
 151 observations at harmonized spatial resolutions. To ensure a fair comparison, all products were  
 152 spatially resampled to match specific target resolutions using the bilinear interpolation method.  
 153 Panels (a)–(c) display the accuracy evaluation when all products are unified to a 0.25° spatial  
 154 resolution, which is consistent with the native resolution of X-BASE. Panels (d)–(f) present the  
 155 corresponding performance when all datasets are unified to a 0.5° spatial resolution, consistent with  
 156 the native resolution of FLUXCOM. The red solid lines represent the linear regression fits, and the  
 157 black dashed lines denote the 1:1 reference line.

158

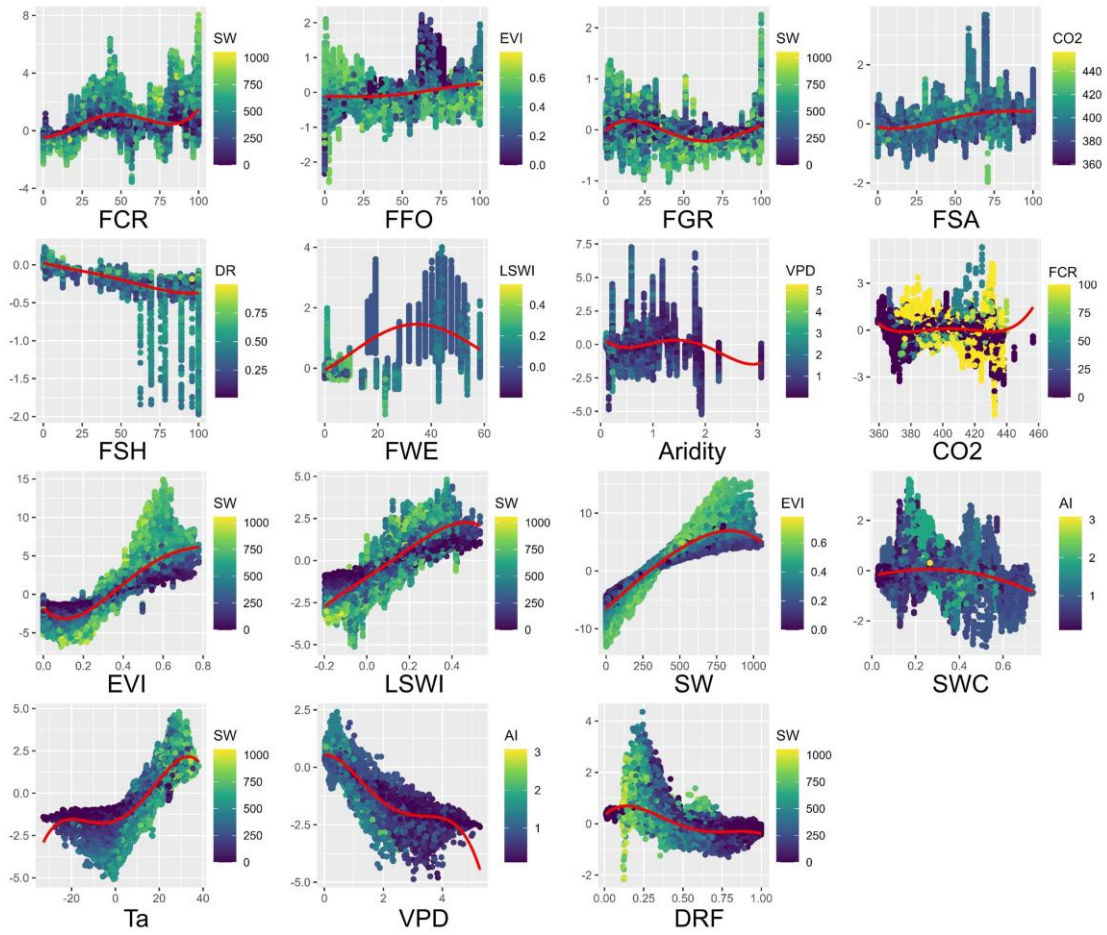

159  
 160  
 161  
 162

**Figure S4.** Interaction between each driver and their corresponding SHAP values.

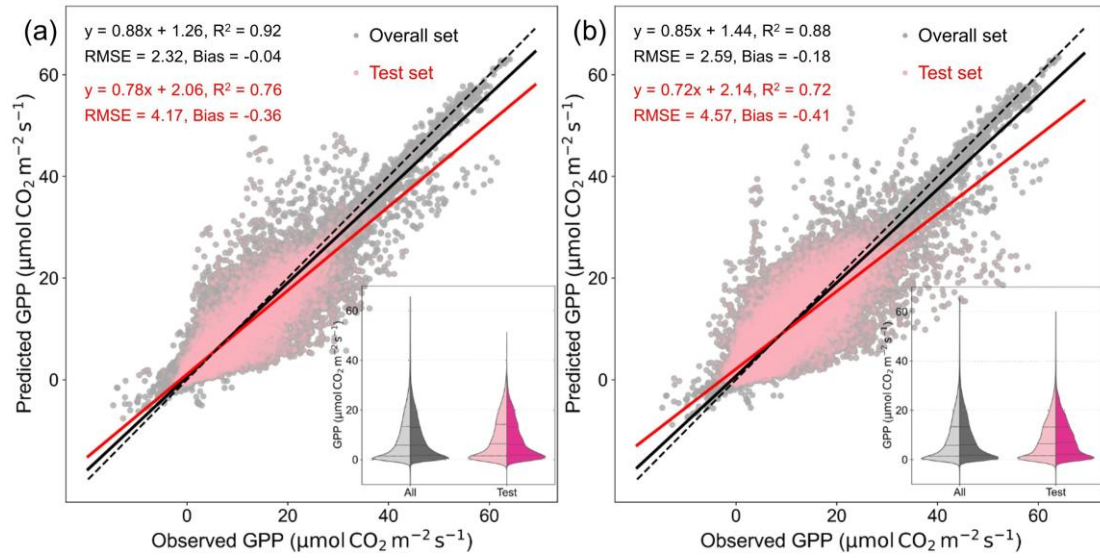

163

164

**Figure S5.** Performance of CKML-GPP of training models (a) with and (b) without aridity index.

165

166

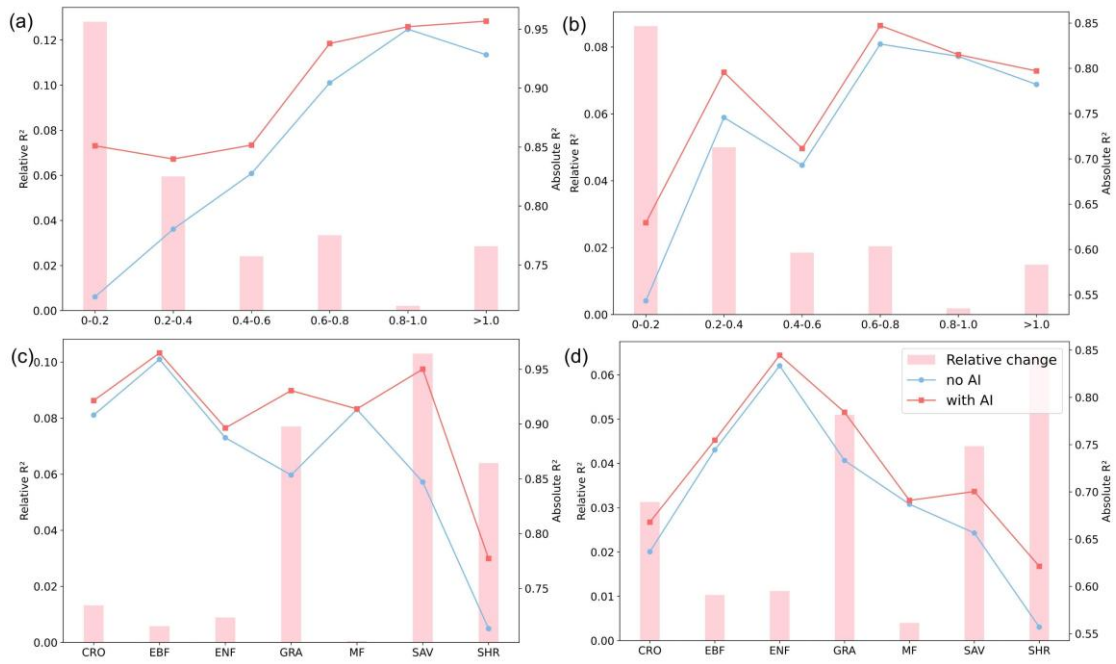

167

168 **Figure S6.** Relative improvement of  $R^2$  across (a,b) aridity gradients and (c,d) vegetation types  
 169 when incorporated aridity index into predictor. Red and blue line represented the evaluation metrics  
 170 with and without aridity index. Pink bar was relative change. (a, c) for training set, and (b, d) for  
 171 test set.

172

173

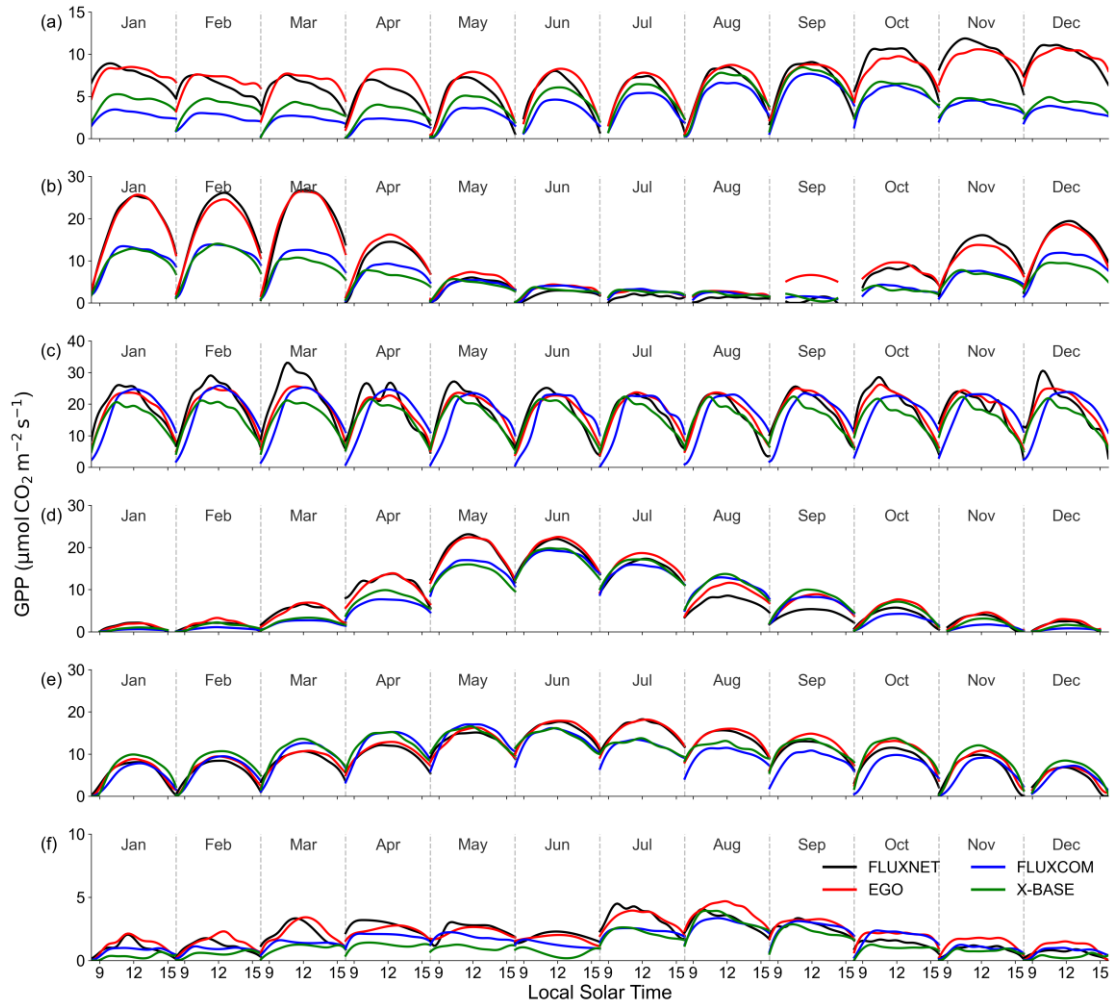

174

175 **Figure S7.** Comparison of diurnal GPP dynamics between site observations and products across diverse biomes for each month of the year. Panels (a)–(f) illustrate the multi-year average diurnal  
 176 GPP variations across different months at six representative flux sites: (a) savannas (AU-Gin), (b)  
 177 grassland (AU-DaP), (c) broadleaf forest (BR-Sa3), (d) cropland (DE-Kli), (e) needleleaf forest  
 178 (US-Blo), and (f) shrubland (US-SRC). The black solid lines represent the in-situ FLUXNET  
 179 observations. The colored lines denote the estimations from different global hourly GPP products:  
 180 EGO (red), FLUXCOM (blue), and X-BASE (green).  
 181

182

183

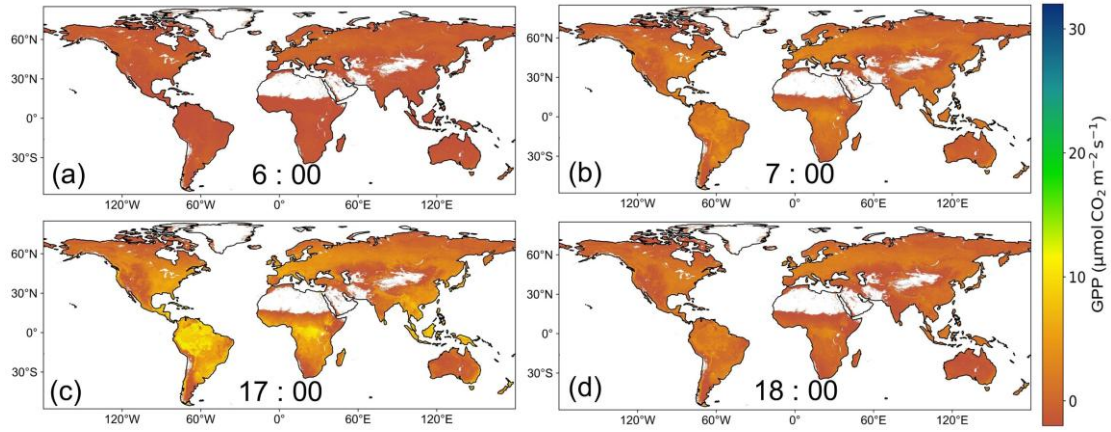

184

185 **Figure S8.** Global diurnal pattern of EGO GPP averaged over the growing seasons from 2000 to  
 186 2022, a-i represents the spatial distribution of GPP in 06:00, 07:00, 17:00, and 18:00.

187

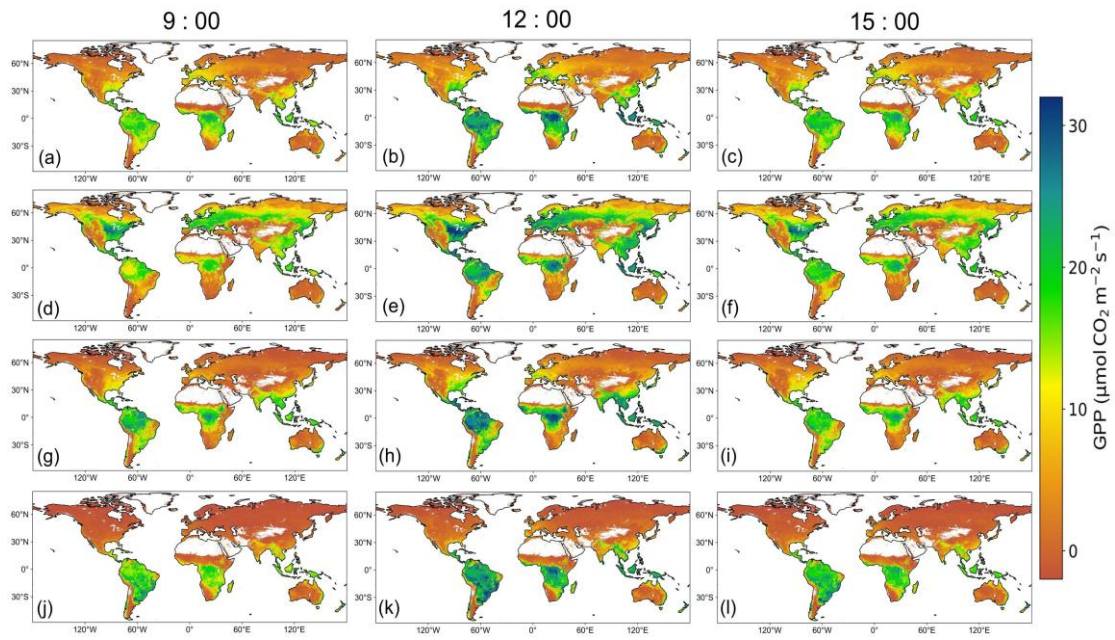

188

189 **Figure S9.** Global diurnal pattern of EGO GPP from 2000 to 2022 in different seasons. (a-c) for  
 190 March to May, (d-f) for June to August, (g-i) for September to November, and (j-l) for December to  
 191 February.

192

193

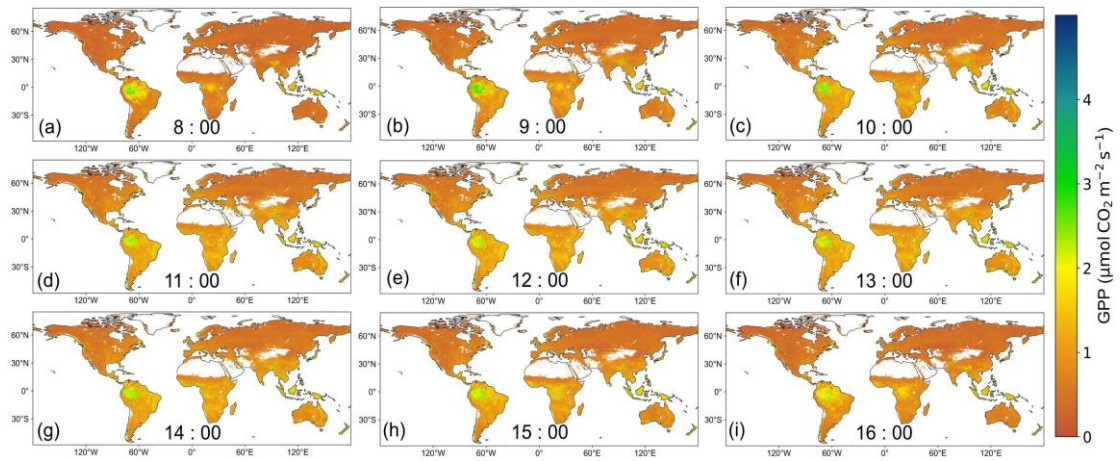

194

195 **Figure S10.** Global diurnal pattern of standard deviation of hourly GPP of EGO at 1-hour intervals  
 196 of local solar time.

197

198

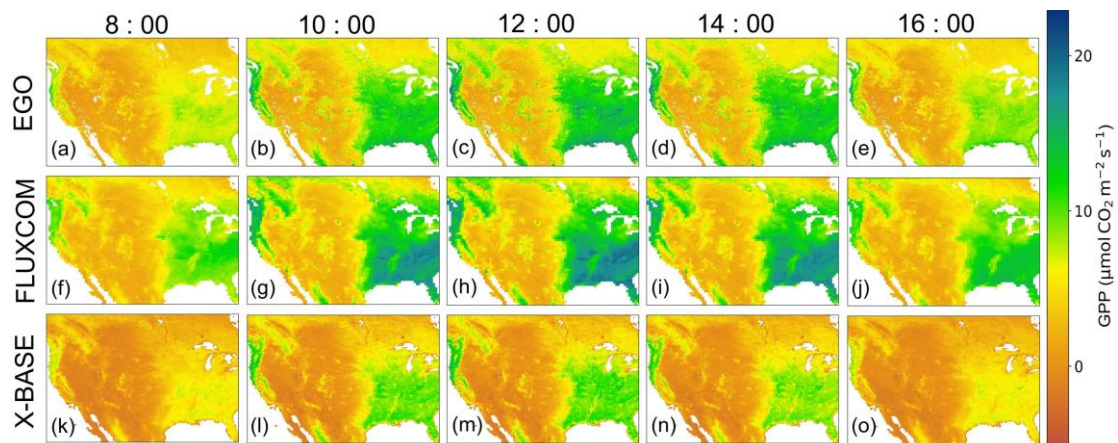

199

200 **Figure S11.** Detailed comparison of diurnal GPP among products in the U.S. Columns 1-5 show  
 201 average GPP maps from 08:00 to 16:00 at 2 h intervals averaged over the growing seasons from  
 202 2000 to 2022, and rows 1-4 correspond to EGO, Fluxcom and X-BASE, respectively.

203

204

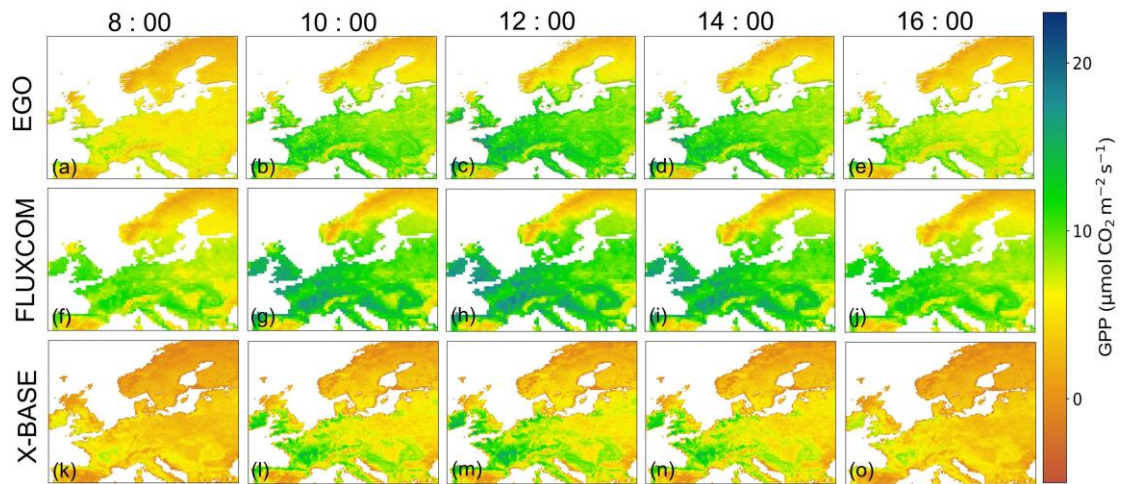

205

206 **Figure S12.** Detailed comparison of diurnal GPP among products in the European. Columns 1-5  
 207 show average GPP maps from 08:00 to 16:00 at 2 h intervals averaged over the growing seasons  
 208 from 2000 to 2022, and rows 1-4 correspond to EGO, Fluxcom and X-BASE, respectively.

209

210

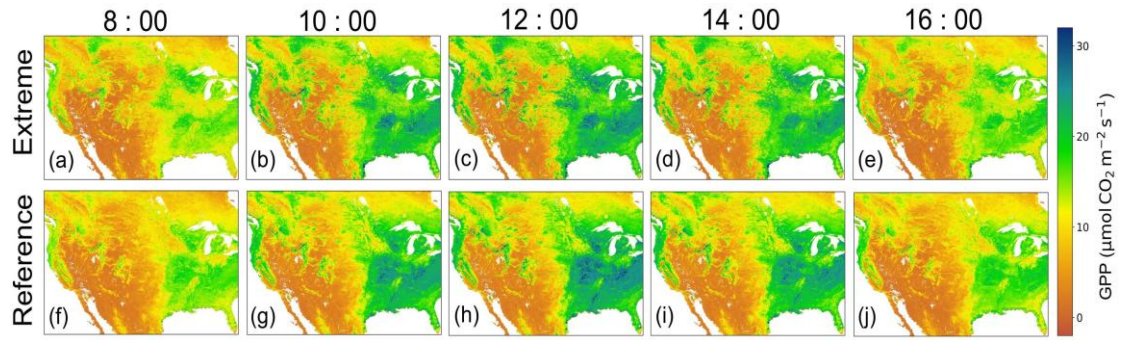

211

212 **Figure S13.** Spatial distribution of GPP in the U.S. during June 2021 (a–e), averaged reference year

213 June (f–j).

214

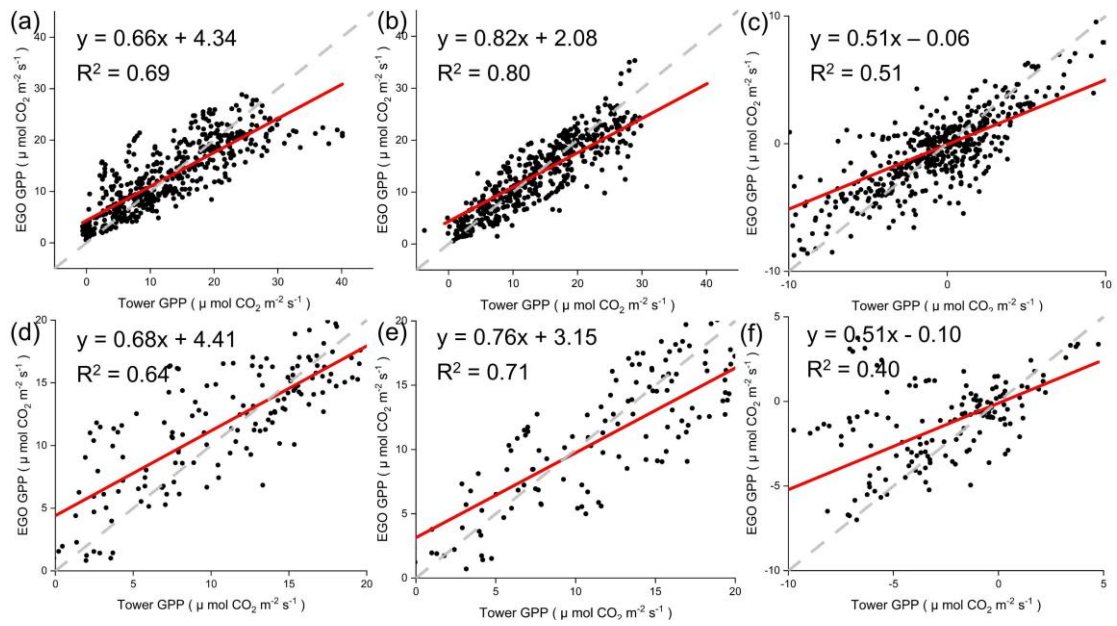

215

216 **Figure S14.** The fitting accuracy of EGO GPP with the corresponding 39 sites GPP in U.S. in (a)

217 June 2021, (b) June of reference year, and (c) anomaly GPP. Similarly, 12 sites GPP in Europe in (d)

218 August 2003, (b) August of reference year, and (f) anomaly GPP.

219

220

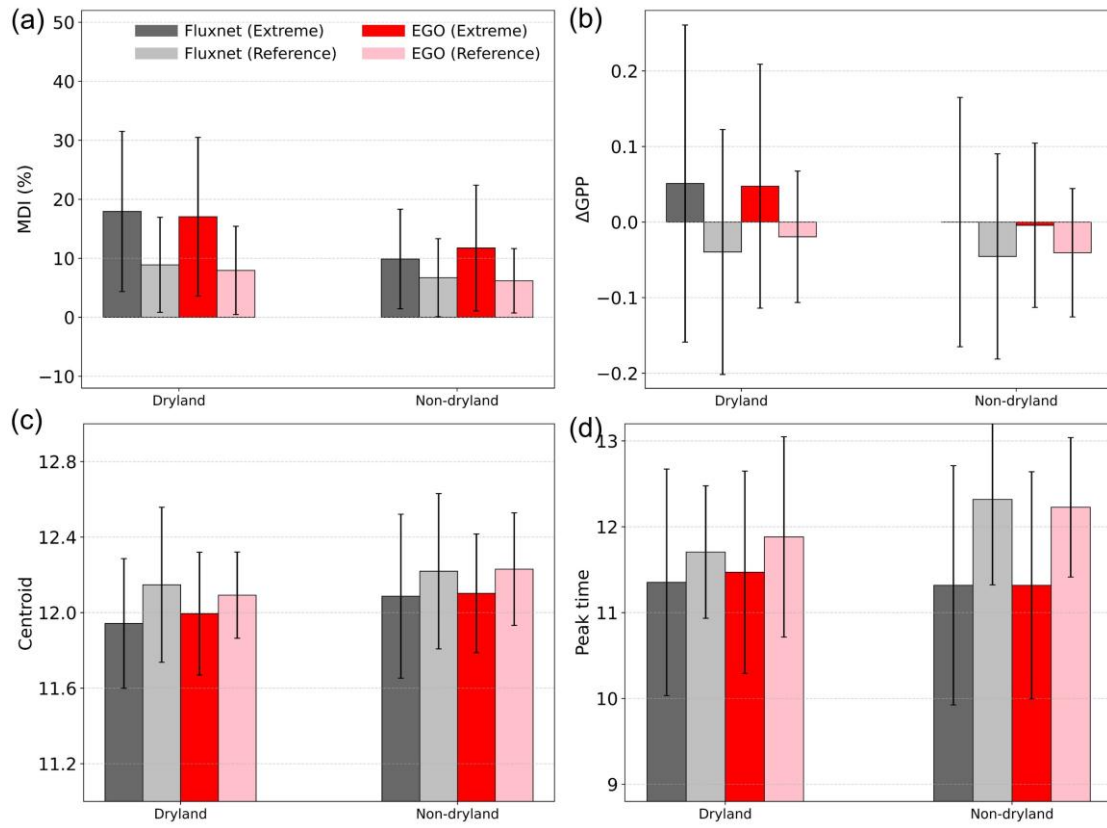

221

222 **Figure S15.** Boxplot of diurnal metrics of site GPP and EGO GPP in dryland and non-dryland in  
 223 U.S. (a) for MDI, (b) for  $\Delta$ GPP, (c) for Centroid and (d) for Peak time.

224

225

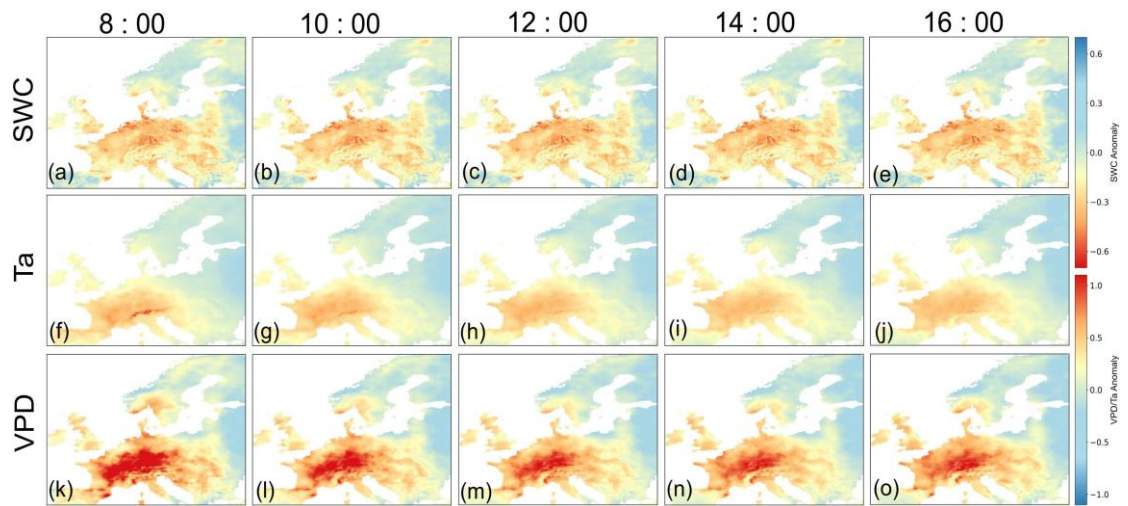

226

227 **Figure S16.** Spatial distribution of anomaly of SWC (a-e), Ta (f-j) and VPD (k-o) in the European  
 228 during August 2003.

229

230

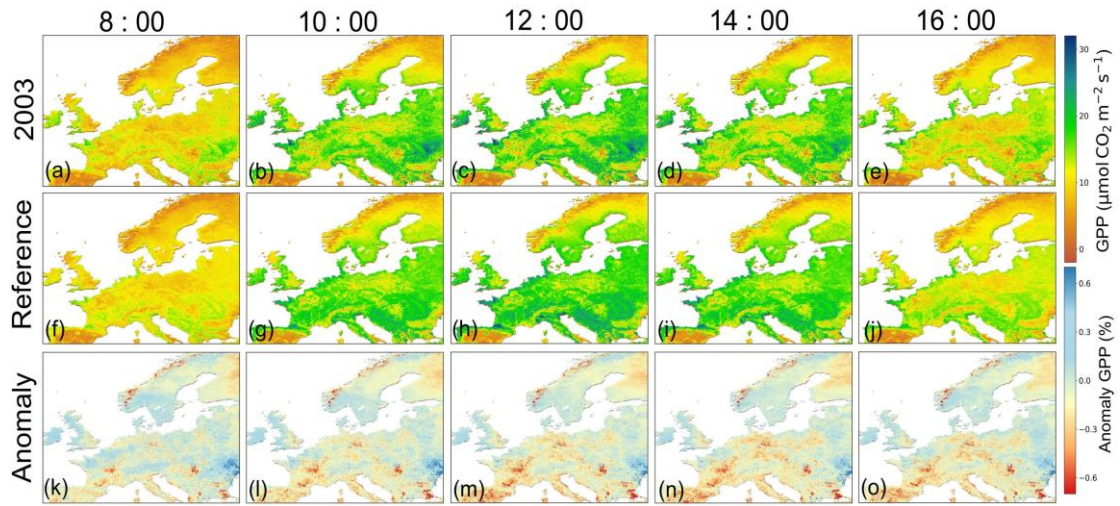

231

232 **Figure S17.** Spatial distribution of GPP in the European during August 2003 (a–e), averaged normal  
 233 year August (f–j), and their anomalies (k–o). Anomaly =  $(\text{GPP}_{2003} - \text{GPP}_{\text{normal}}) / \text{GPP}_{\text{normal}}$ .

234

235

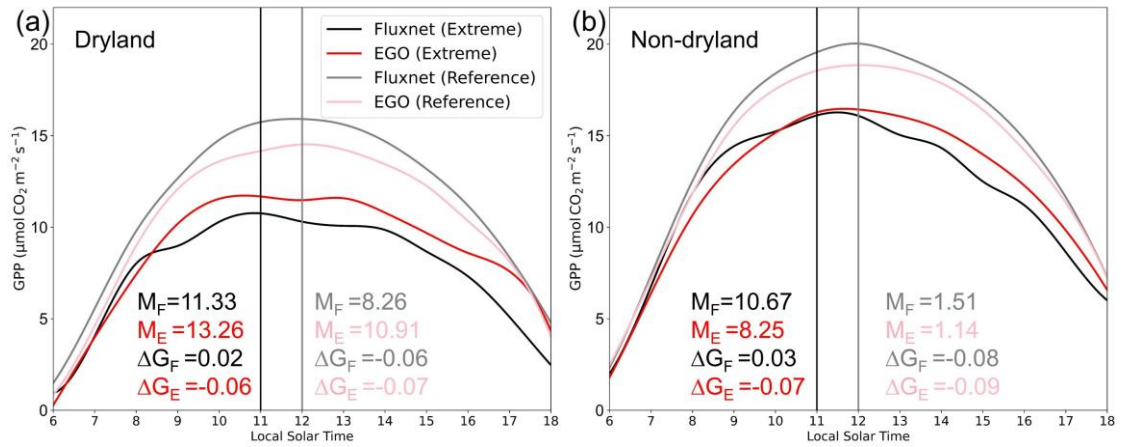

236

237

**Figure S18.** Mean diurnal GPP cycles aggregated for (a) dryland and (b) non-dryland sites in the European. Black and red lines denote average GPP cycles for August 2003, while gray and pink lines represent averaged years for August (Reference). The vertical line represents the peak time.  $M$  and  $\Delta G$  indicate MDI and  $\Delta GPP$ ; F and E denote flux-tower observations and EGO GPP, respectively. Dark and light colors correspond to 2003 and reference-year metrics.

241

242

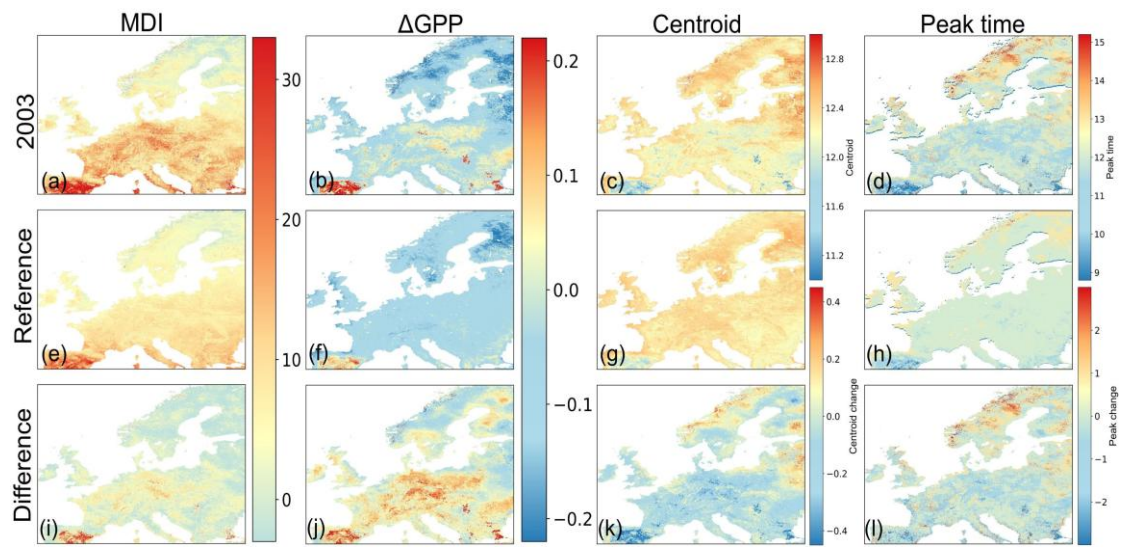

243  
 244  
 245  
 246  
 247

**Figure S19.** Spatial pattern of the diurnal metrics in the European during August 2003 (a-d) and averaged normal year August (e-h), with (i-l) showing their differences (extreme–normal).

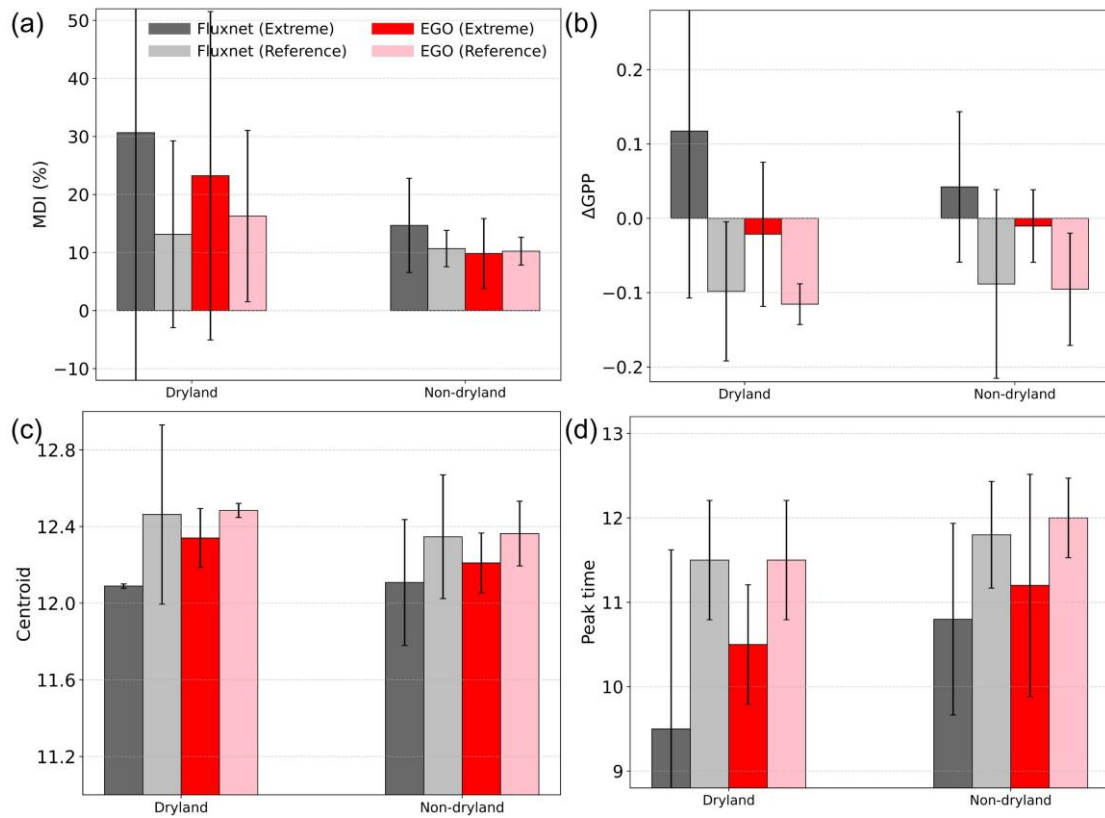

248

249 **Figure S20.** Boxplot of diurnal metrics of site GPP and EGO GPP in dryland and non-dryland in  
 250 European. (a) for MDI, (b) for  $\Delta$ GPP, (c) for Centroid and (d) for Peak time.

251

252 **TableS1.** The information of flux sites used in this study. The reclassification of IGBP vegetation  
 253 types followed these rules: evergreen needleleaf forest (ENF), evergreen broadleaf forest (EBF),  
 254 deciduous needleleaf forest (DNF), deciduous broadleaf forest (DBF), and mixed forest (MF) were  
 255 grouped into Forest; closed shrubland and open shrubland were merged into Shrubland; woody  
 256 savannas and savannas were combined into Savannas. In addition, Grassland, Cropland, and  
 257 Wetland were retained, while non-vegetated pixels were excluded.

| <b>Station</b> | <b>LAT</b> | <b>LONG</b> | <b>IGBP</b> | <b>Reclass</b> | <b>AI</b> |
|----------------|------------|-------------|-------------|----------------|-----------|
| AR-Vir         | -28.2395   | -56.1886    | ENF         | Forest         | 0.991926  |
| AU-DaP         | -14.0633   | 131.3181    | GRA         | Grassland      | 0.500888  |
| AU-Emr         | -23.8587   | 148.4746    | GRA         | Grassland      | 0.278671  |
| AU-Gin         | -31.3764   | 115.7138    | SAV         | Savannas       | 0.319696  |
| AU-GWW         | -30.1913   | 120.6541    | SAV         | Savannas       | 0.106255  |
| AU-How         | -12.4943   | 131.1523    | SAV         | Savannas       | 0.753779  |
| AU-Rig         | -36.6499   | 145.5759    | GRA         | Grassland      | 0.366454  |
| AU-Rob         | -17.1175   | 145.6301    | EBF         | Forest         | 1.829711  |
| AU-Stp         | -17.1507   | 133.3502    | GRA         | Grassland      | 0.232459  |
| AU-Tum         | -35.6566   | 148.1517    | EBF         | Forest         | 1.208532  |
| AU-Wac         | -37.4259   | 145.1878    | EBF         | Forest         | 1.120573  |
| AU-Wom         | -37.4222   | 144.0944    | EBF         | Forest         | 0.850607  |
| AU-Ync         | -34.9893   | 146.2907    | GRA         | Grassland      | 0.230271  |
| BE-Bra         | 51.3076    | 4.5198      | MF          | Forest         | 0.947956  |
| BE-Lon         | 50.5516    | 4.7462      | CRO         | Cropland       | 0.96105   |
| BE-Vie         | 50.3049    | 5.9981      | MF          | Forest         | 1.386077  |
| BR-Npw         | -16.498    | -56.412     | SAV         | Savannas       | 0.8674    |
| BR-Sa1         | -2.8567    | -54.9589    | EBF         | Forest         | 1.432958  |
| BR-Sa3         | -3.018     | -54.9714    | EBF         | Forest         | 1.418789  |
| CA-ARB         | 52.695     | -83.9452    | WET         | Wetland        | 0.9311    |
| CA-Ca1         | 49.8673    | -125.334    | ENF         | Forest         | 1.8893    |
| CA-Ca2         | 49.8705    | -125.291    | ENF         | Forest         | 1.8893    |
| CA-Cbo         | 44.3184    | -79.9341    | DBF         | Forest         | 0.9675    |
| CA-ER1         | 43.6405    | -80.4123    | CRO         | Cropland       | 1.0457    |
| CA-Gro         | 48.2167    | -82.1556    | MF          | Forest         | 0.950414  |
| CA-LP1         | 55.1119    | -122.841    | ENF         | Forest         | 0.9346    |
| CA-Man         | 55.8796    | -98.4808    | ENF         | Forest         | 0.712348  |
| CA-NS1         | 55.8792    | -98.4839    | ENF         | Forest         | 0.712252  |
| CA-NS2         | 55.9058    | -98.5247    | ENF         | Forest         | 0.715733  |
| CA-NS3         | 55.9117    | -98.3822    | ENF         | Forest         | 0.721134  |
| CA-NS4         | 55.9144    | -98.3806    | ENF         | Forest         | 0.721903  |
| CA-NS5         | 55.8631    | -98.485     | ENF         | Forest         | 0.714291  |
| CA-Oas         | 53.6289    | -106.198    | DBF         | Forest         | 0.554919  |
| CA-Obs         | 53.9872    | -105.118    | ENF         | Forest         | 0.566818  |
| CA-SF1         | 54.485     | -105.818    | ENF         | Forest         | 0.61319   |
| CA-TP3         | 42.7068    | -80.3483    | ENF         | Forest         | 0.991783  |
| CA-TPD         | 42.6353    | -80.5577    | DBF         | Forest         | 0.992744  |

|        |         |          |     |           |          |
|--------|---------|----------|-----|-----------|----------|
| CG-Tch | -4.2892 | 11.6564  | SAV | Savannas  | 1.078185 |
| CH-Cha | 47.2102 | 8.4104   | GRA | Grassland | 1.328297 |
| CH-Dav | 46.8153 | 9.8559   | ENF | Forest    | 1.258241 |
| CH-Lae | 47.4783 | 8.3644   | MF  | Forest    | 1.431653 |
| CH-Oe2 | 47.2864 | 7.7337   | CRO | Cropland  | 1.268436 |
| CL-SDF | -41.883 | -73.676  | EBF | Forest    | 3.0706   |
| CN-Cha | 42.4025 | 128.0958 | MF  | Forest    | 0.763632 |
| CN-Cng | 44.5934 | 123.5092 | GRA | Grassland | 0.314945 |
| CN-Dan | 30.4978 | 91.0664  | GRA | Grassland | 0.30837  |
| CN-Din | 23.1733 | 112.5361 | EBF | Forest    | 1.450652 |
| CN-Du2 | 42.0467 | 116.2836 | GRA | Grassland | 0.32201  |
| CN-Du3 | 42.0551 | 116.2809 | GRA | Grassland | 0.316103 |
| CN-HaM | 37.37   | 101.18   | GRA | Grassland | 0.587822 |
| CN-Sw2 | 41.7902 | 111.8971 | GRA | Grassland | 0.15036  |
| CZ-BK1 | 49.5021 | 18.5369  | ENF | Forest    | 1.43765  |
| DE-Geb | 51.0997 | 10.9146  | CRO | Cropland  | 0.584699 |
| DE-Hai | 51.0792 | 10.4522  | DBF | Forest    | 1.094869 |
| DE-Kli | 50.8931 | 13.5224  | CRO | Cropland  | 1.002298 |
| DE-Lkb | 49.0996 | 13.3047  | ENF | Forest    | 1.944474 |
| DE-Lnf | 51.3282 | 10.3678  | DBF | Forest    | 1.18699  |
| DE-Obe | 50.7867 | 13.7213  | ENF | Forest    | 1.059658 |
| DE-RuR | 50.6219 | 6.3041   | GRA | Grassland | 1.377442 |
| DE-RuS | 50.8659 | 6.4471   | CRO | Cropland  | 0.814898 |
| DE-Seh | 50.8706 | 6.4497   | CRO | Cropland  | 0.813893 |
| DE-Tha | 50.9626 | 13.5651  | ENF | Forest    | 0.885046 |
| DK-Fou | 56.4842 | 9.5872   | CRO | Cropland  | 1.013091 |
| ES-Amo | 36.8336 | -2.2523  | SHR | Shrubland | 0.128633 |
| ES-LJu | 36.9266 | -2.7521  | SHR | Shrubland | 0.368305 |
| FI-Hyy | 61.8474 | 24.2948  | ENF | Forest    | 1.060804 |
| FI-Let | 60.6418 | 23.9595  | ENF | Forest    | 0.973933 |
| FR-Fon | 48.4764 | 2.7801   | DBF | Forest    | 0.684879 |
| FR-Gri | 48.8442 | 1.9519   | CRO | Cropland  | 0.674678 |
| FR-Pue | 43.7413 | 3.5957   | EBF | Forest    | 0.48814  |
| GF-Guy | 5.2788  | -52.9249 | EBF | Forest    | 1.805171 |
| GH-Ank | 5.2685  | -2.6942  | EBF | Forest    | 1.279149 |
| GL-ZaH | 74.4733 | -20.5503 | GRA | Grassland | 0.695722 |
| IT-BCi | 40.5237 | 14.9574  | CRO | Cropland  | 0.802622 |
| IT-CA2 | 42.3772 | 12.026   | CRO | Cropland  | 0.245579 |
| IT-Col | 41.8494 | 13.5881  | DBF | Forest    | 0.753786 |
| IT-Cp2 | 41.7043 | 12.3573  | EBF | Forest    | 0.596353 |
| IT-Cpz | 41.7052 | 12.3761  | EBF | Forest    | 0.600799 |
| IT-La2 | 45.9542 | 11.2853  | ENF | Forest    | 0.544502 |
| IT-Lav | 45.9562 | 11.2813  | ENF | Forest    | 0.536086 |
| IT-Ren | 46.5869 | 11.4337  | ENF | Forest    | 0.772143 |

|        |         |          |     |           |          |
|--------|---------|----------|-----|-----------|----------|
| IT-SR2 | 43.732  | 10.2909  | ENF | Forest    | 0.753013 |
| IT-SR0 | 43.7279 | 10.2844  | ENF | Forest    | 0.749533 |
| IT-Tor | 45.8444 | 7.5781   | GRA | Grassland | 1.503514 |
| JP-MBF | 44.3869 | 142.3186 | DBF | Forest    | 1.635463 |
| JP-SMF | 35.2617 | 137.0788 | MF  | Forest    | 1.648311 |
| MY-PSO | 2.973   | 102.3062 | EBF | Forest    | 1.322133 |
| NL-Loo | 52.1666 | 5.7436   | ENF | Forest    | 1.085121 |
| RU-Cok | 70.8291 | 147.4943 | SHR | Shrubland | 0.58537  |
| RU-Fyo | 56.4615 | 32.9221  | ENF | Forest    | 0.948624 |
| RU-Ha1 | 54.7252 | 90.0022  | GRA | Grassland | 0.553207 |
| US-Akn | 33.3825 | -81.5653 | MF  | Forest    | 0.7577   |
| US-AR1 | 36.4267 | -99.42   | GRA | Grassland | 0.297143 |
| US-AR2 | 36.6358 | -99.5975 | GRA | Grassland | 0.302365 |
| US-ARM | 36.6058 | -97.4888 | CRO | Cropland  | 0.491714 |
| US-Bar | 44.0646 | -71.2881 | DBF | Forest    | 1.2812   |
| US-Bi1 | 38.0992 | -121.499 | CRO | Cropland  | 0.222    |
| US-Bi2 | 38.1091 | -121.535 | CRO | Cropland  | 0.2291   |
| US-Blo | 38.8953 | -120.633 | ENF | Forest    | 0.896422 |
| US-BZS | 64.6963 | -148.324 | ENF | Forest    | 0.4647   |
| US-CF1 | 46.7815 | -117.082 | CRO | Cropland  | 0.4916   |
| US-CF2 | 46.784  | -117.091 | CRO | Cropland  | 0.4916   |
| US-CF3 | 46.7551 | -117.126 | CRO | Cropland  | 0.4736   |
| US-CF4 | 46.7518 | -117.129 | CRO | Cropland  | 0.4736   |
| US-Cop | 38.09   | -109.39  | GRA | Grassland | 0.189553 |
| US-CRT | 41.6285 | -83.3471 | CRO | Cropland  | 0.742022 |
| US-Cst | 33.0442 | -91.9204 | ENF | Forest    | 0.9489   |
| US-DFC | 43.3448 | -89.7117 | CRO | Cropland  | 0.7681   |
| US-EML | 63.8784 | -149.254 | SHR | Shrubland | 0.7239   |
| US-Fwf | 35.4454 | -111.772 | GRA | Grassland | 0.2881   |
| US-Ha1 | 42.5378 | -72.1715 | DBF | Forest    | 1.099351 |
| US-Ho1 | 45.2041 | -68.7402 | ENF | Forest    | 1.1078   |
| US-Ho2 | 45.2091 | -68.747  | ENF | Forest    | 1.1229   |
| US-IB2 | 41.8406 | -88.241  | GRA | Grassland | 0.812575 |
| US-ICH | 68.6068 | -149.296 | SHR | Shrubland | 0.5515   |
| US-ICt | 68.6063 | -149.304 | SHR | Shrubland | 0.5566   |
| US-Jo1 | 32.582  | -106.635 | SHR | Shrubland | 0.1249   |
| US-Jo2 | 32.5849 | -106.603 | SHR | Shrubland | 0.1249   |
| US-KFS | 39.0561 | -95.1907 | GRA | Grassland | 0.6859   |
| US-KLS | 38.7745 | -97.5684 | GRA | Grassland | 0.4507   |
| US-Kon | 39.0824 | -96.5603 | GRA | Grassland | 0.5742   |
| US-Lin | 36.3566 | -119.092 | CRO | Cropland  | 0.1554   |
| US-Me2 | 44.4526 | -121.559 | ENF | Forest    | 0.717831 |
| US-Me3 | 44.3154 | -121.608 | ENF | Forest    | 0.412902 |
| US-Me5 | 44.4372 | -121.567 | ENF | Forest    | 0.633482 |

---

|        |         |          |     |           |          |
|--------|---------|----------|-----|-----------|----------|
| US-Me6 | 44.3233 | -121.608 | ENF | Forest    | 0.413754 |
| US-MMS | 39.3232 | -86.4131 | DBF | Forest    | 0.929459 |
| US-Mo1 | 39.2298 | -92.1167 | CRO | Cropland  | 0.748    |
| US-Mo3 | 39.2322 | -92.1493 | CRO | Cropland  | 0.748    |
| US-MOz | 38.7441 | -92.2    | DBF | Forest    | 0.7403   |
| US-Myb | 38.0499 | -121.765 | WET | Wetland   | 0.201679 |
| US-NC1 | 35.8118 | -76.7119 | ENF | Forest    | 0.8775   |
| US-NC3 | 35.799  | -76.656  | ENF | Forest    | 0.8902   |
| US-Ne1 | 41.1651 | -96.4766 | CRO | Cropland  | 0.580269 |
| US-Ne2 | 41.1649 | -96.4701 | CRO | Cropland  | 0.581517 |
| US-Ne3 | 41.1797 | -96.4397 | CRO | Cropland  | 0.579032 |
| US-Oho | 41.5545 | -83.8438 | DBF | Forest    | 0.761    |
| US-OWC | 41.3795 | -82.5125 | WET | Wetland   | 0.7759   |
| US-PFa | 45.9459 | -90.2723 | MF  | Forest    | 0.905195 |
| US-Ro1 | 44.7143 | -93.0898 | CRO | Cropland  | 0.7004   |
| US-Ro2 | 44.7288 | -93.0888 | CRO | Cropland  | 0.7004   |
| US-Ro5 | 44.691  | -93.0576 | CRO | Cropland  | 0.711    |
| US-Ro6 | 44.6946 | -93.0578 | CRO | Cropland  | 0.711    |
| US-Seg | 34.3623 | -106.702 | GRA | Grassland | 0.1095   |
| US-Ses | 34.3349 | -106.744 | SHR | Shrubland | 0.1131   |
| US-Sne | 38.0369 | -121.755 | GRA | Grassland | 0.2113   |
| US-SP1 | 29.7381 | -82.2188 | ENF | Forest    | 0.8091   |
| US-SRC | 31.9083 | -110.84  | SHR | Shrubland | 0.155234 |
| US-SRG | 31.7894 | -110.828 | GRA | Grassland | 0.22216  |
| US-Syv | 46.242  | -89.3477 | MF  | Forest    | 0.955047 |
| US-Ton | 38.4309 | -120.966 | SAV | Savannas  | 0.342592 |
| US-Tw2 | 38.0969 | -121.637 | CRO | Cropland  | 0.21349  |
| US-Tw3 | 38.1152 | -121.647 | CRO | Cropland  | 0.217776 |
| US-Twt | 38.1087 | -121.653 | CRO | Cropland  | 0.217052 |
| US-UMB | 45.5598 | -84.7138 | DBF | Forest    | 0.818674 |
| US-UMd | 45.5625 | -84.6975 | DBF | Forest    | 0.81652  |
| US-Var | 38.4133 | -120.951 | GRA | Grassland | 0.335051 |
| US-WCr | 45.8059 | -90.0799 | DBF | Forest    | 0.921557 |
| US-Whs | 31.7438 | -110.052 | SHR | Shrubland | 0.149825 |
| US-Wi0 | 46.6188 | -91.0814 | ENF | Forest    | 0.845314 |
| US-Wi1 | 46.7305 | -91.2329 | DBF | Forest    | 0.842827 |
| US-Wi2 | 46.6869 | -91.1528 | ENF | Forest    | 0.868687 |
| US-Wi3 | 46.6347 | -91.0987 | DBF | Forest    | 0.86199  |
| US-Wi4 | 46.7393 | -91.1663 | ENF | Forest    | 0.847938 |
| US-Wi5 | 46.6531 | -91.0858 | ENF | Forest    | 0.853917 |
| US-Wi8 | 46.7223 | -91.2524 | DBF | Forest    | 0.850212 |
| US-Wi9 | 46.7385 | -91.0746 | ENF | Forest    | 0.858191 |
| US-Wkg | 31.7365 | -109.942 | GRA | Grassland | 0.169065 |
| US-xAB | 45.7624 | -122.33  | ENF | Forest    | 2.2572   |

---

---

|        |         |          |     |           |        |
|--------|---------|----------|-----|-----------|--------|
| US-xAE | 35.4106 | -99.0588 | GRA | Grassland | 0.3495 |
| US-xBR | 44.0639 | -71.2873 | DBF | Forest    | 1.2812 |
| US-xCL | 33.4012 | -97.57   | GRA | Grassland | 0.4702 |
| US-xCP | 40.8155 | -104.746 | GRA | Grassland | 0.2149 |
| US-xDC | 47.1617 | -99.1066 | GRA | Grassland | 0.3745 |
| US-xDL | 32.5417 | -87.8039 | MF  | Forest    | 0.9132 |
| US-xGR | 35.689  | -83.5019 | DBF | Forest    | 1.0297 |
| US-xHA | 42.5369 | -72.1727 | DBF | Forest    | 1.0855 |
| US-xHE | 63.8757 | -149.213 | SHR | Shrubland | 0.709  |
| US-xJR | 32.5907 | -106.843 | SHR | Shrubland | 0.1169 |
| US-xKA | 39.1104 | -96.6129 | GRA | Grassland | 0.5704 |
| US-xKZ | 39.1008 | -96.5631 | GRA | Grassland | 0.5742 |
| US-xML | 37.3783 | -80.5248 | DBF | Forest    | 0.9891 |
| US-xNG | 46.7697 | -100.915 | GRA | Grassland | 0.3338 |
| US-xSE | 38.8901 | -76.56   | DBF | Forest    | 0.8226 |
| US-xSR | 31.9107 | -110.836 | SHR | Shrubland | 0.1422 |
| US-xST | 45.5089 | -89.5864 | DBF | Forest    | 0.8892 |
| US-xTA | 32.9505 | -87.3933 | ENF | Forest    | 0.9781 |
| US-xTR | 45.4937 | -89.5857 | DBF | Forest    | 0.8823 |
| US-xUN | 46.2339 | -89.5373 | MF  | Forest    | 0.9666 |
| US-xWD | 47.1282 | -99.2414 | GRA | Grassland | 0.3706 |

---

258

259

260 **TableS2.** Global datasets used in the CKML-GPP model for the production of EGO GPP. Here, we  
 261 displayed the original resolution of all the data source. In the study, we unified the temporal  
 262 resolution to hourly and the spatial resolution to 0.05°. Additionally, we reaffirm the abbreviations  
 263 each feature: incoming shortwave radiation (SW), enhanced vegetation index (EVI), air temperature  
 264 (Ta), land surface water index (LSWI), vapor pressure deficit (VPD), aridity index (Aridity), diffuse  
 265 radiation fraction (DRF), atmospheric CO<sub>2</sub> concentration (CO<sub>2</sub>) and soil water content (SWC). FCR,  
 266 FFO, FSA, FGR, FEW, and FSH denoting as the fraction of Cropland, Forest, Savannas, Grassland,  
 267 Wetland and Shrubland in every 0.05° grid.

| Variable        | Year      | Temporal | Spatial     | Resource         |
|-----------------|-----------|----------|-------------|------------------|
| Aridity         | \         | \        | 0.05°       | Global-AI_PET_v3 |
| Ta              | 2000-2022 | Hourly   | 0.1°        | ERA5-Land        |
| VPD             | 2000-2022 | Hourly   | 0.1°        | ERA5-Land        |
| SWC             | 2000-2022 | Hourly   | 0.1°        | ERA5-Land        |
| SW              | 2000-2022 | Hourly   | 0.1°        | ERA5-Land        |
| CO <sub>2</sub> | 2000-2022 | 3-hourly | 3°, 2°      | CarbonTracker    |
| EVI             | 2000-2022 | Daily    | 0.05°       | MCD43C4          |
| LSWI            | 2000-2022 | Daily    | 0.05°       | MCD43C4          |
| DRF             | 2000-2022 | Hourly   | 0.5°,0.625° | MERRA2           |
| FFO             | 2000-2022 | Yearly   | 0.05°       | MCD12Q1          |
| FSH             | 2000-2022 | Yearly   | 0.05°       | MCD12Q1          |
| FSA             | 2000-2022 | Yearly   | 0.05°       | MCD12Q1          |
| FGR             | 2000-2022 | Yearly   | 0.05°       | MCD12Q1          |
| FCR             | 2000-2022 | Yearly   | 0.05°       | MCD12Q1          |
| FWE             | 2000-2022 | Yearly   | 0.05°       | MCD12Q1          |

268

269

270 **TableS3.** Multicollinearity test used the variance inflation factor (VIF). F means VIF < 10,  
271 indicating satisfy the collinearity criterion and could be used in subsequent modeling.

| <b>ID</b> | <b>Feature</b> | <b>Collinearity</b> |
|-----------|----------------|---------------------|
| 1         | CO2            | F                   |
| 2         | FCR            | F                   |
| 3         | SWC            | F                   |
| 4         | FFO            | F                   |
| 5         | FWE            | F                   |
| 6         | Aridity        | F                   |
| 7         | FSA            | F                   |
| 8         | DRF            | F                   |
| 9         | SW             | F                   |
| 10        | FGR            | F                   |
| 11        | FSH            | F                   |
| 12        | LSWI           | F                   |
| 13        | EVI            | F                   |
| 14        | VPD            | F                   |
| 15        | Ta             | F                   |

272

273

274 **References**

- 275 Zerubavel, Eviatar. "The Standardization of Time: A Sociohistorical Perspective." *American Journal of*  
276 *Sociology*, vol. 88, no. 1, 1982, pp. 1–23. JSTOR, <http://www.jstor.org/stable/2779401>.
- 277 Huete, A., Didan, K., Miura, T., Rodriguez, E. P., Gao, X., and Ferreira, L. G.: Overview of the  
278 radiometric and biophysical performance of the MODIS vegetation indices, *Remote Sens. Environ.*,  
279 83, 195-213, [https://doi.org/DOI 10.1016/S0034-4257\(02\)00096-2](https://doi.org/DOI 10.1016/S0034-4257(02)00096-2), 2002.
- 280 Li, W., Yao, Z., Qu, Y., Yang, H., Song, Y., Song, L., Wu, L., and Cui, Y.: A benchmark dataset for  
281 global evapotranspiration estimation based on FLUXNET2015 from 2000 to 2022, *Earth Syst. Sci.*  
282 *Data*, 17, 3835-3855, <https://doi.org/10.5194/essd-17-3835-2025>, 2025.
- 283 Li, X. and Xiao, J.: Mapping photosynthesis solely from solar-induced chlorophyll fluorescence : a global,  
284 fine-resolution dataset of gross primary production derived from OCO-2, *Remote Sens.*, 11, 21,  
285 <https://doi.org/10.3390/rs11212563>, 2019.
- 286 Yuan, W., Zheng, Y., Piao, S., Ciais, P., Lombardozzi, D., Wang, Y., Ryu, Y., Chen, G., Dong, W., Hu,  
287 Z., Jain, A. K., Jiang, C., Kato, E., Li, S., Lienert, S., Liu, S., Nabel, J. E. M. S., Qin, Z., Quine, T.,  
288 Sitch, S., Smith, W. K., Wang, F., Wu, C., Xiao, Z., and Yang, S.: Increased atmospheric vapor  
289 pressure deficit reduces global vegetation growth, *Sci. Adv.*, 5, 12,  
290 <https://doi.org/10.1126/sciadv.aax1396>, 2019.
- 291 Zeng, Y., Hao, D., Huete, A., Dechant, B., Berry, J., Chen, J. M., Joiner, J., Frankenberg, C., Bond-  
292 Lamberty, B., Ryu, Y., Xiao, J., Asrar, G. R., and Chen, M.: Optical vegetation indices for  
293 monitoring terrestrial ecosystems globally, *Nat. Rev. Earth Environ.*, 3, 477-493,  
294 <https://doi.org/10.1038/s43017-022-00298-5>, 2022.
- 295 Zhang, Q., Wei, S., Chu, X., Zhang, X., Gong, Z., Wang, X., Song, W., Song, Y., Xie, B., and Han, G.:  
296 Climate and vegetation jointly determine the interannual variation of net ecosystem CO<sub>2</sub> fluxes over  
297 12 years in a restored coastal wetland, *Agric. For. Meteorol.*, 373, 10,  
298 <https://doi.org/10.1016/j.agrformet.2025.110760>, 2025.

299

300
